# Supplementary material for: Distinct genomic organization, mRNA expression and cellular localization of members of two amastin sub-families present in Trypanosoma cruzi
Source: PubMed Central journal article supplement (PMC3598723; doi:10.1186/1471-2180-13-10), 2013-01-17

(A)

| Strain                 | Haplotype              | Strain                 |                        | CL Brener             |                       |                       |                       |                        |                       |                        |                       |            |            |            |            |          |  |         |  |
|------------------------|------------------------|------------------------|------------------------|-----------------------|-----------------------|-----------------------|-----------------------|------------------------|-----------------------|------------------------|-----------------------|------------|------------|------------|------------|----------|--|---------|--|
|                        |                        | Class                  | ID                     | Esm-like              |                       | Esm-like              |                       | Non-Esm                |                       | Non-Esm                |                       | Esm-like   |            | Non-Esm    |            | Esm-like |  | Non-Esm |  |
|                        |                        |                        |                        | δ-amastin             | δ-amastin             | δ-amastin             | δ-amastin             | δ-amastin              | δ-amastin             | δ-Ama40                | δ-Ama50               | β1-amastin | β1-amastin | β2-amastin | β2-amastin |          |  |         |  |
| Tc00.1047053507485.130 | Tc00.1047053507485.150 | Tc00.1047053507739.120 | Tc00.1047053506437.10  | Tc00.1047053506437.30 | Tc00.1047053509289.10 | Tc00.1047053511071.40 | Tc00.1047053511903.50 | Tc00.1047053509965.390 | Tc00.1047053509051.20 | Tc00.1047053509965.394 | Tc00.1047053511497.19 |            |            |            |            |          |  |         |  |
| CL Brener              | Esm-like               | δ-amastin              | Tc00.1047053507485.130 |                       |                       |                       |                       |                        |                       |                        |                       |            |            |            |            |          |  |         |  |
| CL Brener              | Esm-like               | δ-amastin              | Tc00.1047053507485.150 | 100                   |                       |                       |                       |                        |                       |                        |                       |            |            |            |            |          |  |         |  |
| CL Brener              | Esm-like               | δ-amastin              | Tc00.1047053507739.120 | 86                    | 86                    |                       |                       |                        |                       |                        |                       |            |            |            |            |          |  |         |  |
| CL Brener              | Non-Esm                | δ-amastin              | Tc00.1047053506437.10  | 85                    | 85                    | 95                    |                       |                        |                       |                        |                       |            |            |            |            |          |  |         |  |
| CL Brener              | Non-Esm                | δ-amastin              | Tc00.1047053506437.30  | 85                    | 85                    | 99                    | 95                    |                        |                       |                        |                       |            |            |            |            |          |  |         |  |
| CL Brener              | Non-Esm                | δ-amastin              | Tc00.1047053509289.10  | 85                    | 85                    | 98                    | 95                    | 98                     |                       |                        |                       |            |            |            |            |          |  |         |  |
| CL Brener              | Esm-like               | δ-Ama40                | Tc00.1047053511071.40  | 48                    | 48                    | 49                    | 50                    | 50                     | 50                    | 50                     |                       |            |            |            |            |          |  |         |  |
| CL Brener              | Non-Esm                | δ-Ama50                | Tc00.1047053511903.50  | 50                    | 50                    | 51                    | 51                    | 51                     | 51                    | 51                     | 87                    |            |            |            |            |          |  |         |  |
| CL Brener              | Esm-like               | β1-amastin             | Tc00.1047053509965.390 | 18                    | 18                    | 22                    | 22                    | 22                     | 22                    | 15                     | 20                    |            |            |            |            |          |  |         |  |
| CL Brener              | Non-Esm                | β1-amastin             | Tc00.1047053509051.20  | 18                    | 18                    | 21                    | 21                    | 21                     | 21                    | 15                     | 21                    | 97         |            |            |            |          |  |         |  |
| CL Brener              | Esm-like               | β2-amastin             | Tc00.1047053509965.394 | 35                    | 35                    | 31                    | 32                    | 32                     | 32                    | 27                     | 28                    | 25         | 25         |            |            |          |  |         |  |
| CL Brener              | Non-Esm                | β2-amastin             | Tc00.1047053511497.19  | 32                    | 32                    | 31                    | 32                    | 32                     | 32                    | 21                     | 20                    | 17         | 18         | 93         |            |          |  |         |  |

| Strain    | Haplotype | Strain     |                        | Sylvio            |               |                  |                  | Esm              |                  | Esm              |                  | Esm        |  | Esm        |  |
|-----------|-----------|------------|------------------------|-------------------|---------------|------------------|------------------|------------------|------------------|------------------|------------------|------------|--|------------|--|
|           |           | Class      | ID                     | δ-amastin         |               | β1-amastin       |                  | δ-amastin        |                  | δ-amastin        |                  | β1-amastin |  | β2-amastin |  |
|           |           |            |                        | sylviocontig_7286 | Sylvio-pDelta | sylviocontig_527 | sylviocontig_527 | scf7180000307809 | scf7180000307960 | scf7180000308152 | scf7180000308152 |            |  |            |  |
| CL Brener | Esm-like  | δ-amastin  | Tc00.1047053507485.130 | 83                | 51            | 18               | 34               | 86               | 48               | 18               | 34               |            |  |            |  |
| CL Brener | Esm-like  | δ-amastin  | Tc00.1047053507485.150 | 83                | 51            | 18               | 34               | 86               | 48               | 18               | 34               |            |  |            |  |
| CL Brener | Esm-like  | δ-amastin  | Tc00.1047053507739.120 | 91                | 51            | 24               | 31               | 85               | 48               | 22               | 31               |            |  |            |  |
| CL Brener | Non-Esm   | δ-amastin  | Tc00.1047053506437.10  | 92                | 50            | 24               | 31               | 88               | 48               | 24               | 31               |            |  |            |  |
| CL Brener | Non-Esm   | δ-amastin  | Tc00.1047053506437.30  | 90                | 52            | 24               | 31               | 85               | 49               | 22               | 31               |            |  |            |  |
| CL Brener | Non-Esm   | δ-amastin  | Tc00.1047053509289.10  | 91                | 52            | 21               | 31               | 85               | 49               | 22               | 31               |            |  |            |  |
| CL Brener | Esm-like  | δ-Ama40    | Tc00.1047053511071.40  | 49                | 86            | 15               | 25               | 50               | 96               | 15               | 27               |            |  |            |  |
| CL Brener | Non-Esm   | δ-Ama50    | Tc00.1047053511903.50  | 50                | 90            | 21               | 25               | 50               | 87               | 20               | 27               |            |  |            |  |
| CL Brener | Esm-like  | β1-amastin | Tc00.1047053509965.390 | 20                | 19            | 95               | 26               | 21               | 11               | 89               | 25               |            |  |            |  |
| CL Brener | Non-Esm   | β1-amastin | Tc00.1047053509051.20  | 20                | 19            | 98               | 28               | 24               | 11               | 97               | 25               |            |  |            |  |
| CL Brener | Esm-like  | β2-amastin | Tc00.1047053509965.394 | 31                | 22            | 25               | 89               | 31               | 28               | 26               | 99               |            |  |            |  |
| CL Brener | Non-Esm   | β2-amastin | Tc00.1047053511497.19  | 30                | 19            | 18               | 94               | 31               | 22               | 18               | 94               |            |  |            |  |

(B)

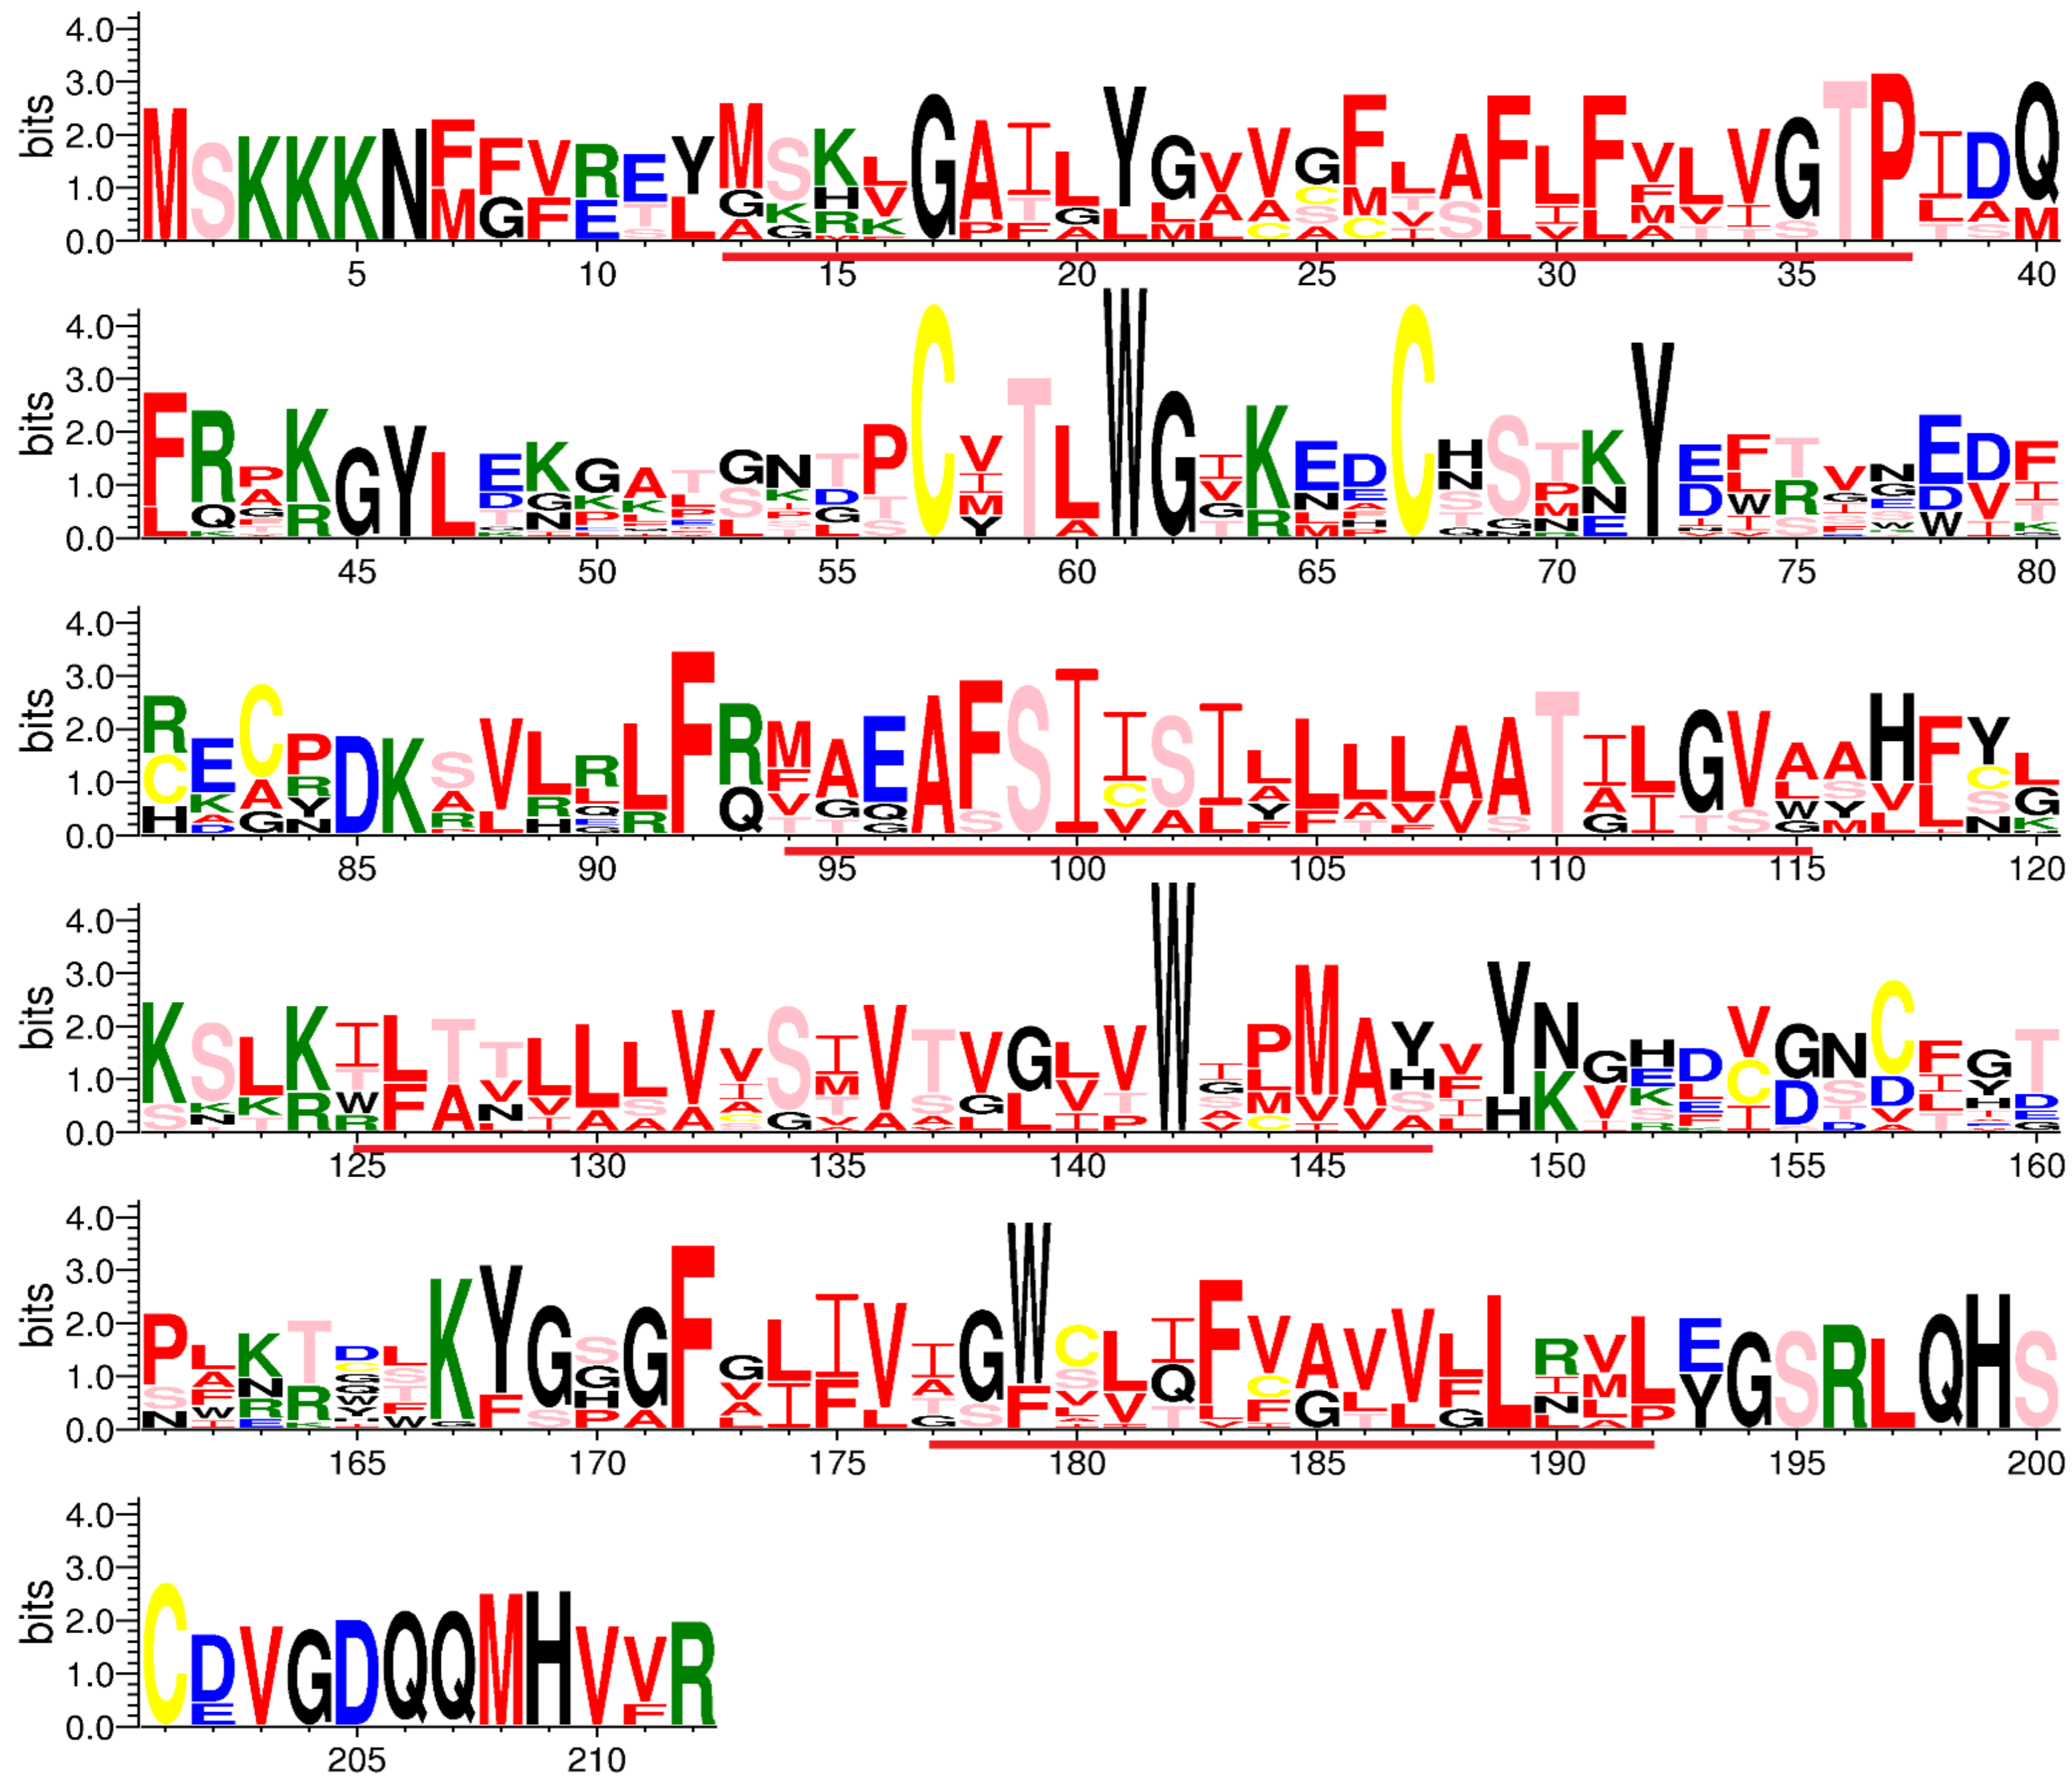

Supplement: 1471-2180-13-10-S1.pdf [file 1471-2180-13-10-S1.pdf]
