# Supplementary material for: Distinct genomic organization, mRNA expression and cellular localization of members of two amastin sub-families present in Trypanosoma cruzi
Source: PubMed Central journal article supplement (PMC3598723; doi:10.1186/1471-2180-13-10), 2013-01-17
Supplement: 1471-2180-13-10-S2.pdf [file 1471-2180-13-10-S2.pdf]

|                   |            |            |            |             |            |            |            |            |
|-------------------|------------|------------|------------|-------------|------------|------------|------------|------------|
| $\delta$ -amastin | -----      | --MSKLGAIL | YGAVGFLAFL | FVLVGTPIDQ  | FRAK---    | EKG        | ATGNTPCMTL |            |
| $\delta$ Ama40    | -----      | --MSMVGAIL | YGVVSFTALL | LMLVGTPLDQ  | FRFR---    | TNP        | LPLIDPCVTL |            |
| $\beta$ 1-amastin | MSK        | KKNFVVR    | EYGHK      | GATG        | LLLACMVSFI | FFVIGTPIAM | LQPK-----  | -LSSGTCYTL |
| $\beta$ 2-amastin | -----      | MGFE       | TLAGRVG    | PFA         | YMVCACISFV | FATVSTPTSQ | FRGKGYLDGG | KESKLSCVTA |
|                   |            |            |            |             |            |            |            |            |
| $\delta$ -amastin | WGIKEDCHST | KYEFTVGEDF | RECP--SVLR | LFERMAEAFSI | ISILLLLAAT | ALGVAAHFCL |            |            |
| $\delta$ -Ama40   | WGGKLFCSGT | EYIISGEDVI | HECY--AVLG | LEFRVAEASSI | VSIALLLVAT | ILGVLSHLYK |            |            |
| $\beta$ 1-amastin | WGTR-PCNSP | NYNWRVNWDT | CKAR----   | RL          | RFQFGEAFSI | CALYFAVVA- | GIGSWYVLSG |            |
| $\beta$ 2-amastin | WGVKNECTSN | KYDLRSSEIK | CEGNDKRLHQ | LFQTTQAFSI  | ISIFLTFAS- | IITVGMLFNG |            |            |
|                   |            |            |            |             |            |            |            |            |
| $\delta$ -amastin | KSLKIFATLL | LVSIVTVGL  | VWIPMAYFYN | -HDVDNCLGT  | PLKTC      | SKYGG      | GFVIIVIGWC |            |
| $\delta$ -Ama40   | KSLRRLTNVL | LVS        | GMVTVGV    | VWGLMVHVK   | -EKIGDCIVT | PFKTQLKFGH | GFGLIVASWS |            |
| $\beta$ 1-amastin | SNKKWLTVLA | SAISTVSGLV | TWSMVASIHN | VKLCGSDTYT  | SAN--TKYGP | GFALFVTGFV |            |            |
| $\beta$ 2-amastin | KSTRRLTLLL | AVASVAALLI | PWACMAAVYK | GSFCGTVFHD  | NWRRD      | WKYSS      | AFGLFLGGWL |            |
|                   |            |            |            |             |            |            |            |            |
| $\delta$ -amastin | LIFVAVLLR  | ML-----    | -----      | --          |            |            |            |            |
| $\delta$ -ama40   | LTFFAVVFLN | LPYGSRLQHS | CDVGDQQMHV | VR          |            |            |            |            |
| $\beta$ 1-amastin | VQFCGLLGLI | VLE-----   | -----      | --          |            |            |            |            |
| $\beta$ 2-amastin | VQLVGTVFL  | AL-----    | -----      | --          |            |            |            |            |
