# Supplementary material for: Distinct genomic organization, mRNA expression and cellular localization of members of two amastin sub-families present in Trypanosoma cruzi
Source: PubMed Central journal article supplement (PMC3598723; doi:10.1186/1471-2180-13-10), 2013-01-17
Supplement: 1471-2180-13-10-S4.pdf [file 1471-2180-13-10-S4.pdf]

**Supplementary table 1.** Amastin sequences used to generate the phylogenetic tree shown in figure 1.

| Sequence ID            | T. cruzi strain              | Genomic location                                  | Classification     |
|------------------------|------------------------------|---------------------------------------------------|--------------------|
| Tc00.1047053509965.390 | CL Brener Esmeraldo-like     | <i>In silico</i> chromosome - TcChr32-S           | $\beta$ 1-amastin  |
| Tc00.1047053509051.20  | CL Brener Non-Esmeraldo-like | <i>In silico</i> chromosome - TcChr32-P           | $\beta$ 1-amastin  |
| Tc00.1047053509965.394 | CL Brener Esmeraldo-like     | <i>In silico</i> chromosome - TcChr32-S           | $\beta$ 2-amastin  |
| Tc00.1047053511497.19  | CL Brener Non-Esmeraldo-like | <i>In silico</i> chromosome - TcChr32-P           | $\beta$ 2-amastin  |
| Tc00.1047053507739.120 | CL Brener Esmeraldo-like     | <i>In silico</i> chromosome - TcChr34-S           | $\delta$ -amastin  |
| Tc00.1047053506437.10  | CL Brener Non-Esmeraldo-like | <i>In silico</i> chromosome - TcChr34-P           | $\delta$ -amastin  |
| Tc00.1047053507485.150 | CL Brener Esmeraldo-like     | <i>In silico</i> chromosome - TcChr34-S           | $\delta$ -amastin  |
| Tc00.1047053506437.30  | CL Brener Non-Esmeraldo-like | <i>In silico</i> chromosome - TcChr34-P           | $\delta$ -amastin  |
| Tc00.1047053507485.130 | CL Brener Esmeraldo-like     | <i>In silico</i> chromosome - TcChr34-S           | $\delta$ -amastin  |
| Tc00.1047053509289.10  | CL Brener Non-Esmeraldo-like | <i>In silico</i> chromosome - TcChr34-P           | $\delta$ -amastin  |
| Tc00.1047053511071.40  | CL Brener Esmeraldo-like     | <i>In silico</i> chromosome - TcChr26-S           | $\delta$ -ama40/50 |
| Tc00.1047053511903.50  | CL Brener Non-Esmeraldo-like | <i>In silico</i> chromosome - TcChr26-P           | $\delta$ -ama40/50 |
| Esm_scf7180000308152b  | Esmeraldo                    | Scaffold - scf7180000308152 (Length = 144,278 bp) | $\beta$ 1-amastin  |
| Esm_scf7180000308152a  | Esmeraldo                    | Scaffold - scf7180000308152 (Length = 144,278 bp) | $\beta$ 2-amastin  |
| Esm_scf7180000307809   | Esmeraldo                    | Scaffold - scf7180000307809 (Length = 31,745 bp)  | $\delta$ -amastin  |
| Esm_scf7180000307960   | Esmeraldo                    | Scaffold - scf7180000307960 (Length = 49,875 bp)  | $\delta$ -ama40/50 |
| Sylviocontig_527b      | Sylvio X10/1                 | Contig - sylviocontig_527 (Length = 9,484 bp)     | $\beta$ 1-amastin  |
| Sylviocontig_527a      | Sylvio X10/1                 | Contig - sylviocontig_527 (Length = 9,484 bp)     | $\beta$ 2-amastin  |
| Sylviocontig_7286      | Sylvio X10/1                 | Contig - sylviocontig_7286 (Length = 959 bp)      | $\delta$ -amastin  |
| Sylvio_IR              | Sylvio X10/1                 | Assembling of individual reads (this work)        | $\delta$ -ama40/50 |
